# Supplementary material
Source: ML conference proceedings conference paper supplement (https://openaccess.thecvf.com/content/CVPR2025/html/Peng_BizGen_Advancing_Article-level_CVPR_2025_paper.html)
Supplement: Supplementary file 1 [file Peng_BizGen_Advancing_Article-level_CVPR_2025_supplemental.pdf]

# BizGEN: Advancing Article-level Visual Text Rendering for Infographics Generation

## Appendix

### A. Dataset Statistics of SLIDES-500K

We present statistics on the number of text layers, non-text layers, total layers, characters, and pages across the entire SLIDES-500K dataset in Figure 16. Each set consists of multiple slide pages with the same style. Compared to Figure 7 in the main paper, we find that a single-page slide typically has a sparser layout than an infographic; however, the total number of layers accumulated across a set of slides can far exceed that of an infographic.

### B. Training Settings

Table 7 details the training hyperparameter choices for our infographic generation model and slides generation model, respectively. We use a smaller glyph loss weight for infographics to avoid artifacts, such as shadows, after extensive tuning on data with denser layouts.

### C. Layer-wise Retrieval-Augmented Infographics Data Engine

**Dominant Layer Selection.** We present the GPT-4o prompt used to identify the main layers in our originally collected infographic data. These layers will be replaced by generated high-quality transparent layers in our data engine.

#### Select dominant object layer Prompt for GPT-4o

You are an experienced visual designer. You are given 1+N images. The first one is the whole image of an infographic. Assume the infographic has N layers. The following N images are different layers of the first image. The caption of the layer images are also given. You are required to classify the layer images into two categories: "Main element" or "Others". "Main element" means the layer should contain at least one specific object, the object(s) should be intact in the layer, and the object(s) should be aesthetically beautiful and the layer shouldn't be too small. Others include solid-colored blocks, decoration layers and any other layers that do not meet the requirements of "Main element". Your answer should be in list format, containing only "Others" or "Main element" and nothing else. The length of the returned list should be equal to N.

**Filtering of the Generated Transparent Layers.** Figure 20 presents examples of both good and bad layers generated with our scalable data engine. The bad layers are filtered out because: (i) objects fill the entire canvas (1st and 2nd in the second row), or (ii) the image has a solid-colored background with a non-zero alpha channel (3rd, 4th, 5th, and 6th in the second row). The remaining layers after the filtering are transparent and of high aesthetic quality.

**Discussion on directly assembling through data engine v.s. generating through BizGEN.** Since we already con-

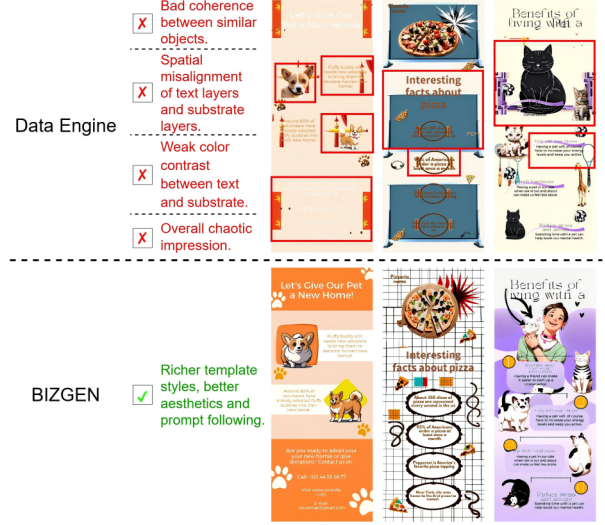

Figure 13. Comparison of assembling through data engine against BizGEN

| Method     | Infographics |             | Slides      |             |             |
|------------|--------------|-------------|-------------|-------------|-------------|
|            | Aesthetics   | Prompt Fo.  | Aesthetics  | Prompt Fo.  | Style Cons. |
| DataEngine | 6.33         | 6.50        | 7.00        | 6.87        | 7.73        |
| BizGEN     | <b>7.74</b>  | <b>8.09</b> | <b>7.64</b> | <b>7.61</b> | <b>8.37</b> |

Table 6. Comparison with the assembled results produced by data engine.

struct the automatic infographic data engine, it seems like we can directly assemble infographics through layer-wise retrieval and text rendering, which ensures 100% OCR accuracy. However, to generate infographics with high diversity, such approach requires retrieving all the non-text layers (different from just doing augmentation where we only select dominant layers), and assembling them. The assembled results lag behind BizGEN in terms of limited template styles, poorer aesthetics, and weaker prompt following. We visualize the quantitative comparison results in Table 6 and qualitative comparison results in Figure 13.

We argue that the poor performance of the assembled infographics lies in the complex relevance between text and non-text layers within an image. First, the explanatory text is usually spatially adjacent to the corresponding non-text elements, enhancing the mapping between visuals and semantics. Second, rather than relying on post-hoc combinations of predefined transparent layers from a database, BizGEN jointly generates both elements end-to-end within a unified generative model ensures intrinsic contextual alignment. Third, texts can have spatially overlapped substrate layers, requiring spatial alignment and contrast in colors, as illustrated in Figure 13.

| Hyperparameter       | BizGEN-Infographics | BizGEN-Slides |
|----------------------|---------------------|---------------|
| Backbone             | Glyph-SDXL          | Glyph-SDXL    |
| UNet Learning-rate   | 1.00E-04            | 1.00E-04      |
| Batch Size           | 128                 | 128           |
| Epochs               | 5                   | 10            |
| Weight Decay         | 0.01                | 0.01          |
| Text-Encoder Dropout | 0.1                 | 0.1           |
| Gradient Clipping    | 1.0                 | 1.0           |
| Resolution           | [2240,896]          | [864,1536]    |
| UNet LoRA Rank       | 128                 | 128           |
| Text Feature Length  | 2048                | 2048          |
| Glyph Loss Weight    | 1                   | 5             |
| Dataset              | INFOGRAPHICS-650K   | SLIDES-500K   |

Table 7. BizGEN Training hyper-parameter choices.

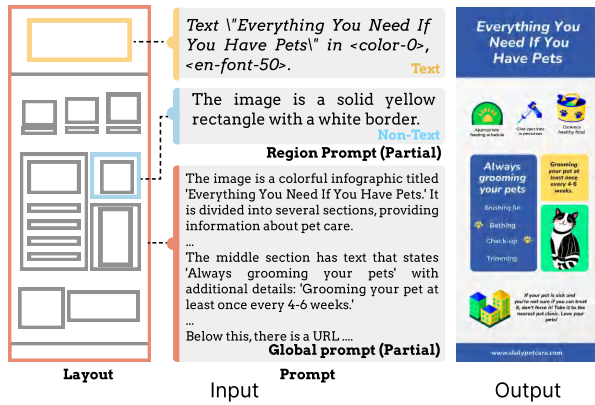

Figure 14. Input and output examples of BizGEN

#### Infographics Global Visual Quality Assurance Prompt for GPT-4o

You are an autonomous AI Assistant who aids designers by providing insightful, objective, and constructive critiques of graphic design projects. Your goals are: Deliver comprehensive and unbiased evaluations of graphic designs based on established design principles and industry standards. Maintain a consistent and high standard of critique.

You will be given an image of graphic design (poster, infographic, slide, etc.) and the caption that describes the content in the image. Please abide by the following rules: Strive to score as objectively as possible. Grade seriously. A flawless design can earn 10 points, a mediocre design can only earn 7 points, a design with obvious shortcomings can only earn 4 points, and a very poor design can only earn 1-2 points. Keep your reasoning concise when rating, and describe it as briefly as possible. If the output is too long, it will be truncated. Only respond in JSON format, no other information.

##### Grading criteria:

**Aesthetics (1-10):** The graphic design should be aesthetically beautiful, with a pleasing color palette, harmonious composition, and appropriate use of space. There should not be artifacts, visual noise, blurriness, wrong words, incomplete text, or any other issues that detract from the overall visual experience. A score of 10 indicates a design that is visually stunning, while a score of 1 indicates a design that is visually unappealing.

**Prompt Following (1-10):** The image should be well aligned with the prompt given. Every object mentioned in the prompt should be present in the image. The object's attribute such as color, size, and position should also match the description in the prompt if assigned. If the prompt mentions text in the image, it should be present and legible, and the texts should also match the logical flow of the prompt. The overall style of the image should also align with the tone of the prompt. A score of 10 indicates perfect alignment, while a score of 1 indicates a complete mismatch.

Your answer should be a dictionary with two keys: 'Aesthetics' and 'Prompt Following', each containing two keys: 'score' and 'reason'. The 'score' should be an integer between 1 and 10, and the 'reason' should be a string explaining the score.

## D. Model Architecture

Figure 14 shows an example of the input layout and regional prompts and the output infographic of BizGEN. We discuss the architecture difference with Glyph-SDXL as follows: While we adopt Glyph-SDXL as our backbone, the key difference lies in the implementation of the region-wise cross-attention scheme. The original GlyphByT5 computes full attention between all text tokens and visual tokens, using a pre-computed attention mask to determine what to generate and where. To deal with far more text and visual tokens in infographic setting, our BizGEN explicitly crops the visual tokens based on the layout and partitions the text tokens within each region. Attention is then computed only between each set of cropped visual tokens and the corresponding regional text tokens, which is critical for higher efficiency. Additionally, we introduce a layout-conditional CFG scheme during inference to further enhance the results.

## E. Global Quality Assurance Prompt

#### Slides Global Visual Quality Assurance Prompt for GPT-4o

You are an autonomous AI Assistant who aids designers by providing insightful, objective, and constructive critiques of graphic design projects. Your goals are: Deliver comprehensive and unbiased evaluations of graphic designs based on established design principles and industry standards. Maintain a consistent and high standard of critique.

You will be given a set of slides and the caption that describes the content in each of the single page. Your score should be based on the overall quality of the slides, not a single page. Please abide by the following rules: Strive to score as objectively as possible. Grade seriously. A flawless design can earn 10 points, a mediocre design can only earn 7 points, a design with obvious shortcomings can only earn 4 points, and a very poor design can only earn 1-2 points. Keep your reasoning concise when rating, and describe it as briefly as possible. If the output is too long, it will be truncated. Only respond in JSON format, no other information.

##### Grading criteria:

**Aesthetics (1-10):** The slides should be aesthetically beautiful, with a pleasing color palette, harmonious composition, and appropriate use of space. There should not be artifacts, visual noise, blurriness, wrong words, incomplete text, or any other issues that detract from the overall visual experience. A score of 10 indicates a design that is visually stunning, while a score of 1 indicates a design that is visually unappealing.

**Prompt Following (1-10):** Every page of the slide should be well aligned with the corresponding prompt given. Every object mentioned in the prompt should be present in the corresponding page. The object's attribute such as color, size, and position should also match the description in the prompt if assigned. If the prompt mentions text in a slide, it should be present and legible, and the texts should also match the logical flow of the prompt. The overall style of the slides should also align with the tone of the prompt. A score of 10 indicates perfect alignment, while a score of 1 indicates a complete mismatch.

**Style Consistency (1-10):** The style of different pages in a set of slide should be consistent. The color palette should be harmonious, the styles of elements in different pages should match, and the font type of text in different pages should also be consistent. A score of 10 indicates a set of slides that are perfectly consistent, while a score of 1 indicates a set of slides that are completely inconsistent.

Your answer should be a dictionary with three keys: 'Aesthetics', 'Prompt Following' and 'Style Consistency', each containing two keys: 'score' and 'reason'. The 'score' should be an integer between 1 and 10, and the 'reason' should be a string explaining the score.

### Layer-wise Quality Assurance Prompt for GPT-4o

You are an objective, strict, cold-blooded, experienced visual art designer. You are given an image and detailed information about it. The information includes:

1. The caption of the full image, which describes the overall content of the image.
2. Two images. The first one is the original image, and the second one is exactly the same, while bounding boxes of the layers and indexes are added to the second one. The layers are given in z-order, from bottom to top, so higher layers may occlude lower layers. Each of the bounding boxes has its index labeled on it, in the same color of the box.

3. The detailed information of each layer in the image, including the caption of the layer and the bounding box of the layer. Bounding boxes are in the format of [top\_left\_x, top\_left\_y, bottom\_right\_x, bottom\_right\_y]. The bbox coordinates are normalized to [0,1]. The occlusion relationship between layers is also provided, which can also be told from the second image with bounding boxes.

4. For each layer, two auxiliary information is provided: "element\_type" and "layer\_description". "element\_type" can either be "block" or "object" for non-background layers. "block" means the layer doesn't contain specific objects, while "object" means the layer contains specific objects. For "block" layers, you should focus on the color and texture of the layer. For "object" layers, you should focus on the specific objects in the layer. "layer\_description" (if given) is a description of the content of the target layer without occlusions. You should decide the score based on the two images given, while the "layer\_description" is only for your reference.

Now for the specified layer, you have to decide whether the region within the bounding box is consistent with the caption of the layer. Your answer should be a score ranging from 0 to 10. 0 means the region is completely irrelevant with the caption, while 10 means the region is perfectly aligned with the caption. The text in the image should be neglected. The key point is to determine whether the object described in the caption appear in the region. You should also provide a detailed reason for your decision. There are some rules for your decision:

- (1). You should consider only the bounded region and the caption of the layer.
- (2). If the caption of the layer is too vague to determine whether the object appears in the region, you should give a low score.
- (3). Most attention should be paid to the main object in the caption. If the main object is missing in the region, you should give a very low score. The main object must be clearly visible, different from the background. This is the most important rule and you must always follow it. If the main object is missing, or the region has no difference from the background, zero score. Specifically, for "object" layers, you should focus on the specific objects in the layer. You can also refer to the "layer\_description" to judge whether it's consistent with the caption.
- (4). If the caption specifies multiple objects, all of them should appear in the region. If some objects are missing, you should deduct points accordingly.
- (5). If the caption specifies a specific attribute of the object, the attribute should be visible in the region and consistent with the caption. For example, if the caption specifies the color of the object, the object should be in the specified color, or you should give a low score. Specifically, for "block" layers, you only have to consider the color and texture of the layer, and "layer\_description" only describes the color. If the color is close to the caption, such as beige compared to white, you shouldn't give low score.
- (6). If the caption described that the main object is on a colored background, the mismatch of color of the background could be tolerated. But if the caption only describes the color of the object or the background, the object or background should be in the specified color.
- (7). Remember the higher layers may occlude lower layers, so you should consider the occlusion relationship between layers. Specifically, higher layer occlude lower layer, and something not described in the caption of the lower layer appears in the region, this should be tolerated and you shouldn't deduct scores because of such reasons. Only layers with larger index occlude lower layers. To judge occlusion, you have to refer to the second image with bounding boxes, and also the detailed bounding box information of each layer if necessary.
- (8). Text in the image region should be neglected. If the caption specifies no text in the region but there is text, you don't have to deduct points.
- (9). If there are artifacts or implausible objects in the region, you should deduct points accordingly.
- (10). You have to be strict and objective in your evaluation and shouldn't easily give a very high score unless the bounded region is consistent with the caption.

Important: Your answer should be in dict format following the example given below, and no other answer needed.

We design a Global Quality Assurance Prompt for GPT-4o to evaluate the overall quality of generated business content from two aspects: visual aesthetics and adherence to the global prompt. Additionally, style consistency is assessed across different pages in a slide set. The detailed system prompts are shown in the brown and sky blue blocks, respectively.

## F. Details about Layer Generation Success Rate

We demonstrate the scoring prompt in our LGSR assessment pipeline in the section titled "Layer-wise Quality Assurance Prompt for GPT-4o." It consists of two parts: (i) an introduction to the information and images provided, and (ii) rules to follow when scoring the layers in the generated images. We further provide a detailed example in Figure 22 to give a clearer picture of how our LGSR assessment pipeline works and what information is required at each step.

## G. Multi-Layer Transparent Infographic Generation

As our INFOGRAPHICS-650K essentially consists of multiple transparent layers, we follow [29] and train a multi-layer generation model on INFOGRAPHICS-650K and present a representative result in Figure 15, which consists of more than 20 transparent layers, including various visual element layers and visual text layers. We believe our INFOGRAPHICS-650K will be a valuable contribution not only to infographic image generation but also to the multi-layer transparent infographic generation task.

## H. Multilingual Infographics and Slides Generation

Our BizGEN model can render visual text in ten different languages, including English, German, Spanish, French, Italian, Portuguese, Russian, Chinese, Japanese, and Korean, thanks to our multilingual datasets INFOGRAPHICS-650K and SLIDES-500K. Table 8 demonstrates the visual text spelling precision of the generated multilingual infographics and slides, while Figures 18 and 19 visualize some qualitative results. We find that our BizGEN can achieve approximately 90% visual text spelling precision in all ten languages, except in cases with dense, tiny visual texts, which slightly drag down the overall performance. We do not compare our multilingual generation results with state-of-the-art methods such as FLUX, as these approaches are primarily trained on English data.

## I. Multi-Style Infographics Generation

As mentioned in Section 3.2, four different LoRAs are used to generate diverse transparent layers for the retrieval database in our infographic data engine. During training,

| Language   | Infographics Visual Text Spelling Precision (%) |               |               |            | Slides Visual Text Spelling Precision (%) |               |               |            |
|------------|-------------------------------------------------|---------------|---------------|------------|-------------------------------------------|---------------|---------------|------------|
|            | ≤10 layers                                      | ≤10-15 layers | ≤15-20 layers | ≥20 layers | ≤10 layers                                | ≤10-20 layers | ≤20-30 layers | ≥30 layers |
| English    | 92.98                                           | 84.25         | 66.42         | 55.48      | 88.13                                     | 88.41         | 80.29         | 66.81      |
| French     | 89.68                                           | 81.02         | 60.07         | 50.97      | 88.91                                     | 85.32         | 78.86         | 60.71      |
| Spanish    | 87.31                                           | 81.68         | 62.37         | 51.89      | 84.38                                     | 83.17         | 74.19         | 60.38      |
| German     | 84.11                                           | 73.99         | 54.24         | 44.34      | 87.06                                     | 82.11         | 73.80         | 52.91      |
| Portuguese | 89.15                                           | 80.74         | 65.73         | 50.58      | 87.40                                     | 88.69         | 77.04         | 63.07      |
| Italian    | 87.23                                           | 80.40         | 64.12         | 53.70      | 93.53                                     | 88.41         | 77.43         | 60.87      |
| Russian    | 83.10                                           | 69.11         | 52.11         | 42.59      | 83.04                                     | 81.17         | 70.16         | 49.41      |
| Chinese    | 92.50                                           | 91.71         | 85.43         | 69.18      | 92.56                                     | 93.22         | 89.39         | 85.68      |
| Japanese   | 94.07                                           | 93.05         | 91.79         | 87.36      | 95.68                                     | 94.32         | 95.65         | 90.46      |
| Korean     | 91.94                                           | 85.57         | 80.80         | 74.94      | 92.1                                      | 94.02         | 89.90         | 83.51      |

Table 8. Illustrating the visual text spelling precision of the multilingual infographics and slides generation results.

we add the corresponding trigger words to the prompts of the replaced layers, allowing the model to learn the style information. This approach enables us to customize our generation by simply adding trigger words to different layer prompts during inference, resulting in aesthetically pleasing infographics in various styles, as shown in Figure 21.

## J. Comparison with State-of-the-art on Slides Generation

In Tables 1 and 2, we have already shown that BIZGEN outperforms state-of-the-art methods in almost every metric for slide generation. Figure 17 provides some qualitative comparison results. An interesting observation is that state-of-the-art methods such as FLUX may sometimes generate only a background instead of a reasonable slide page (columns 2, 5, and 6), which is likely related to their training data.

## K. Ablation on Layout Conditional CFG Timestep Range

We demonstrate the effect of choosing different  $\alpha$  values for layout conditional CFG in Figure 23. Here,  $\alpha$  is the hyperparameter that controls the starting timestep at which layout conditional CFG takes effect in the denoising process, as introduced in Section 3.3. Our goal is to eliminate local artifacts in specific regions without deteriorating others; therefore, we assume that LCFG should be used when  $t$  is close to 0, given that details are settled in the later stages of the diffusion process. Thus, we only alter the starting timestep and apply LCFG toward the end.

From Figure 23 we can see that a small  $\alpha$  may bring too little changes that are not enough to remove the flaws, while a big  $\alpha$  can bring unwanted changes to other regions. Taking the first row as an example, when  $\alpha$  is 0.1 or 0.2, the shadows and irregular color still exist; when  $\alpha$  is 0.8 or 0.9, the navy blue block and the light blue rings begin to fade. To strike the balance, we empirically find that 0.5 is the optimal choice for  $\alpha$  in most cases.

## L. Detailed Prompt List

We illustrate the detailed prompts for generated infographics and slides shown in Figure 1, Figure 10 and Figure 11 in

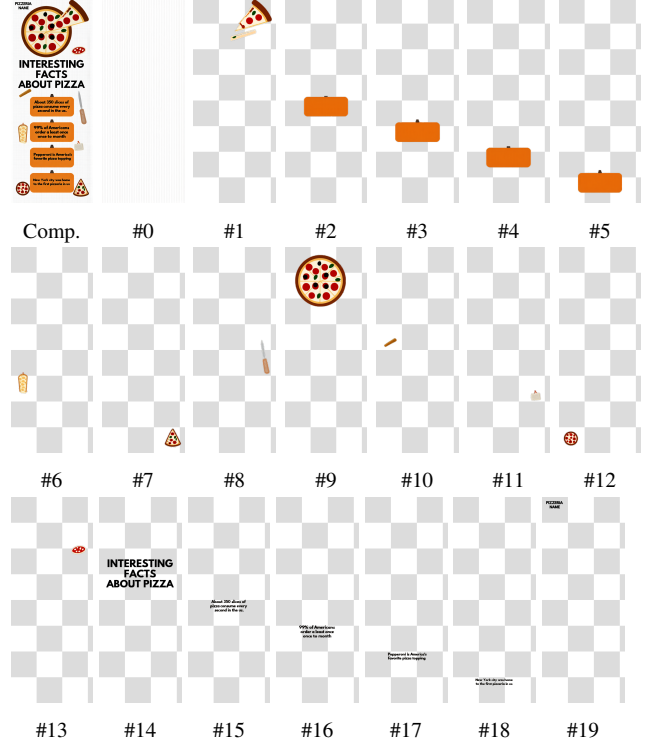

Figure 15. Multi-layer Transparent Infographics Generation Results.

Table 9. For typesetting convenience, we only list the global prompts and all the text layer prompts.

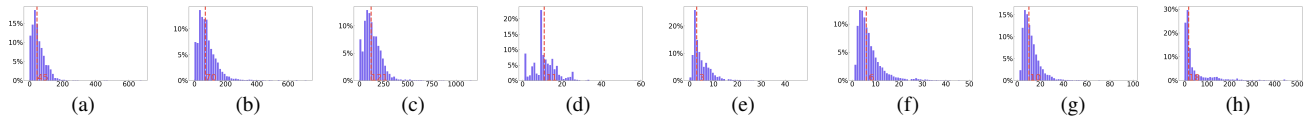

Figure 16. **Illustrating the statistics of our SLIDES-500K:**(a) # of text layers/set, (b) # of non-text layers/set, (c) # of total layers/set, (d) # of pages/set, (e) # of text layers/page, (f) # of non-text layers/page, (g) # of total layers/page, (h) # of chars/text layer. We mark the median values with red dashed lines.

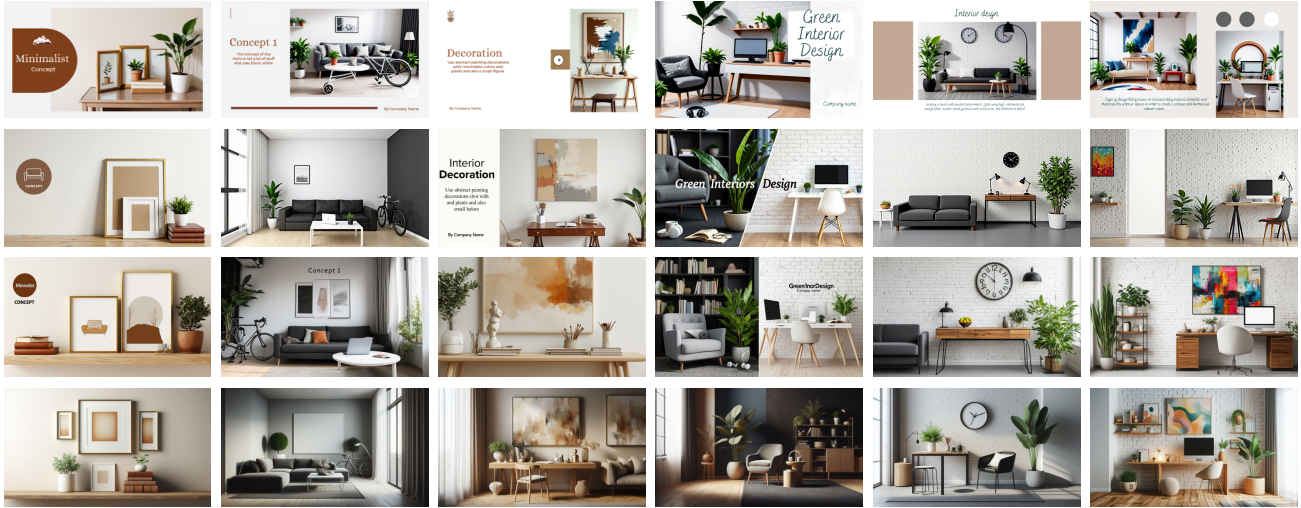

Figure 17. **Qualitative comparison results of slides generation with SOTAs.** The 1st, 2nd, 3rd, and 4th rows correspond to the results generated with our BizGEN, FLUX, SD3 Large, and DALL-E3. The left three columns are in the same set, while the right three columns are in another.

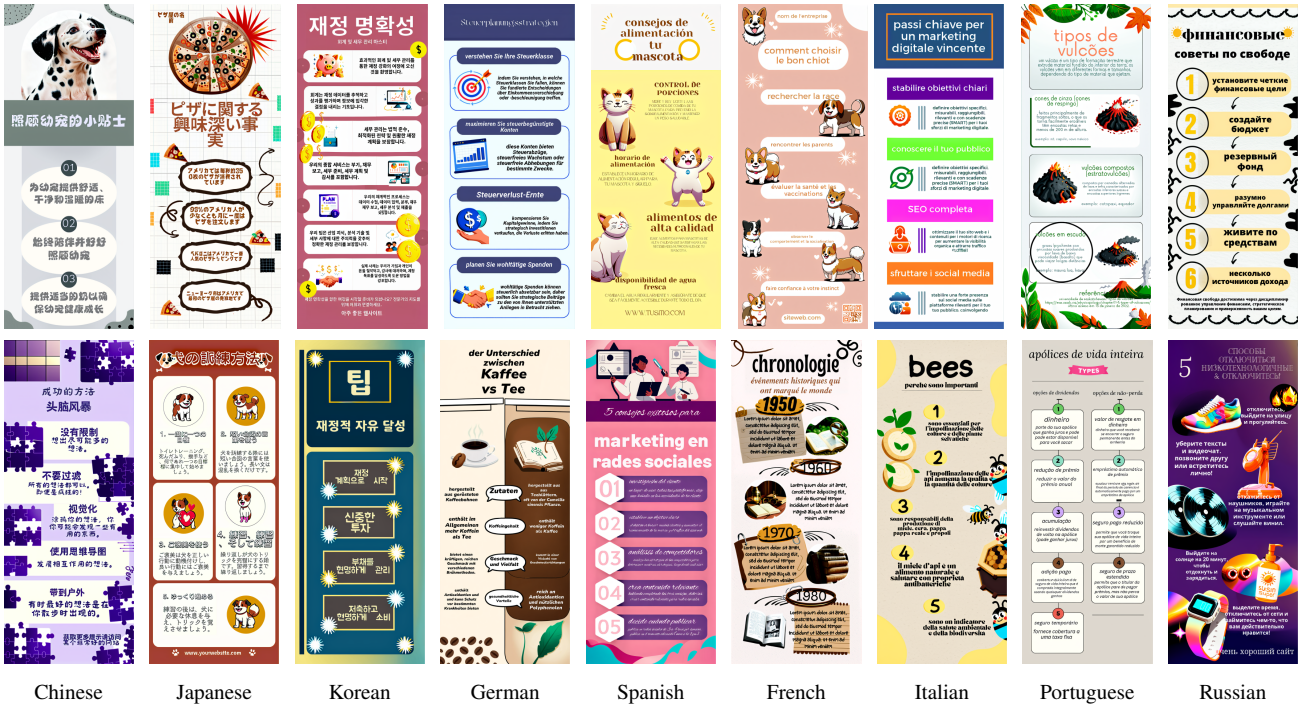

Figure 18. **Qualitative results of multilingual infographics generation.**

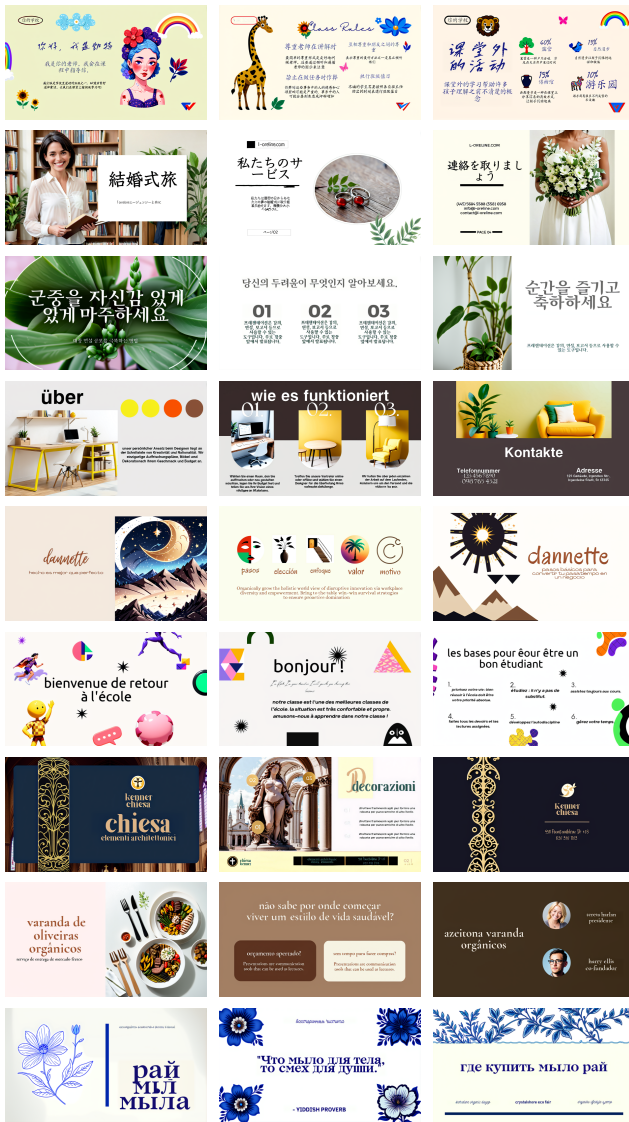

Figure 19. Qualitative results of multilingual slides generation. We show the Chinese, Japanese, Korean, German, Spanish, French, Italian, Portuguese, and Russian visual text results in the nine rows subsequently.

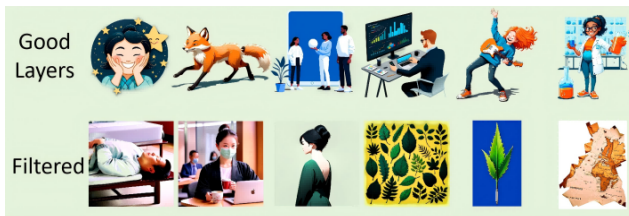

Figure 20. Illustrating the transparent layers generated in the data engine: The first row shows examples of the generated multi-style high-quality transparent layers, while the second row demonstrates the filtered ones.

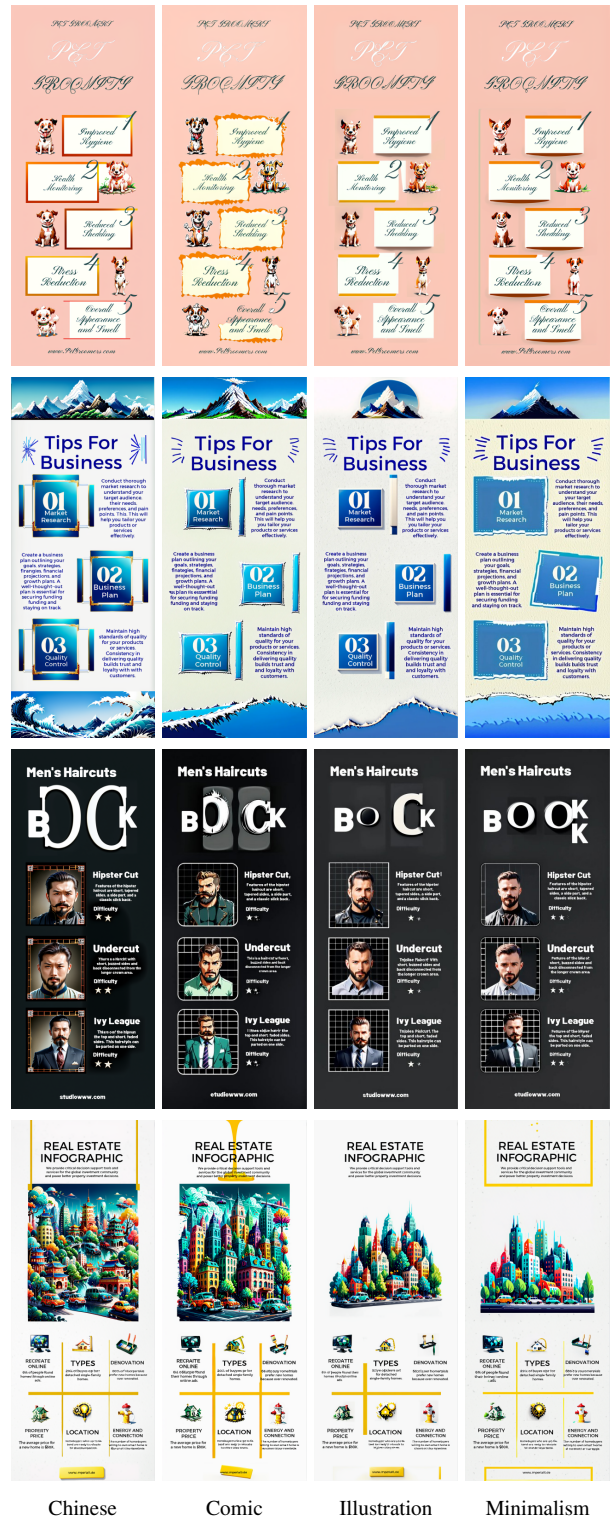

Figure 21. Qualitative results of multi-style infographics generation. The four columns respectively attribute to four different styles: Chinese, Comic, Illustration and Minimalism.

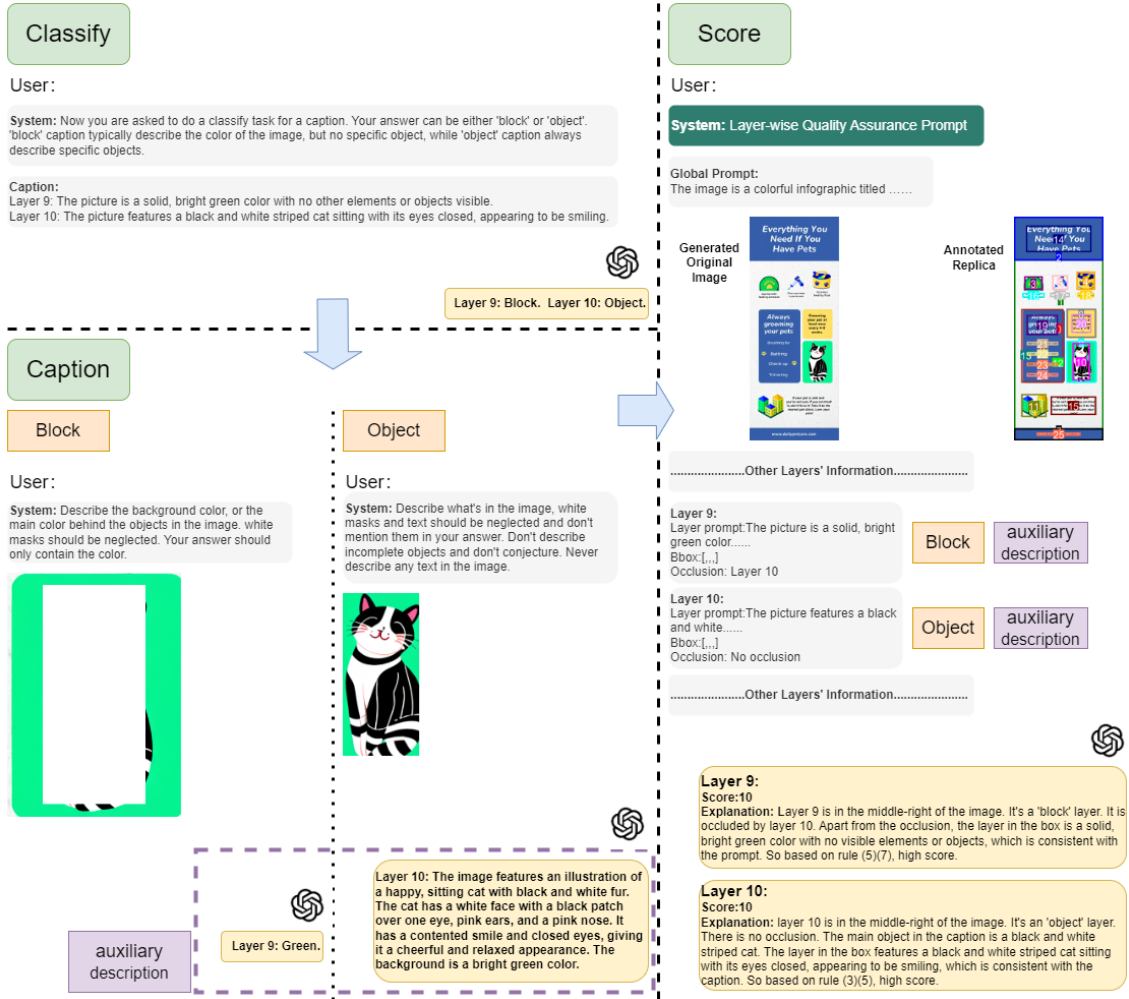

Figure 22. **Example of LGSR Assessment Pipeline:** We give the examples of two layers go through our LGSR assessment pipeline, which cover the two layer types: “object” and “block”. We demonstrate the different information fed to GPT-4o in every step, and highlight the response by GPT-4o, including its explanation.

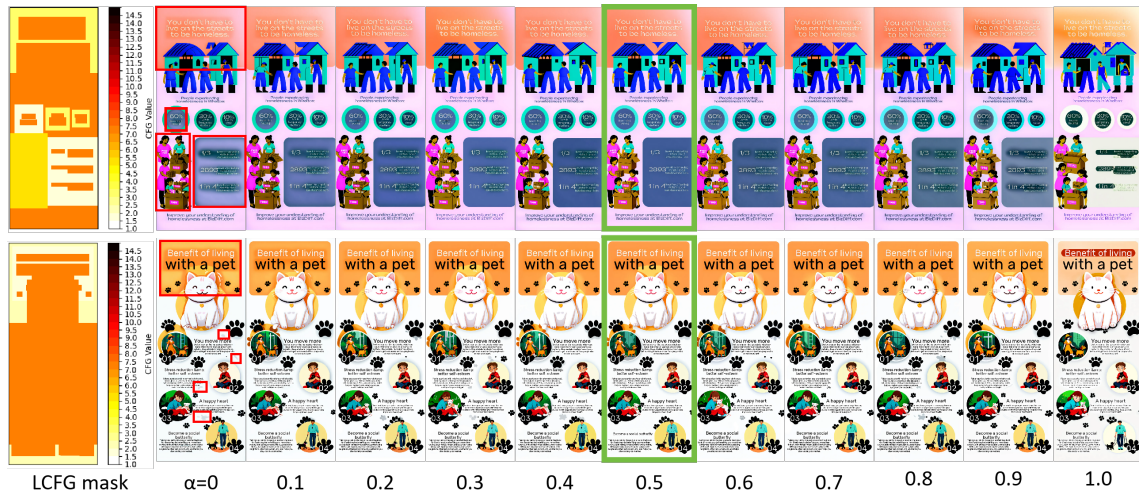

Figure 23. **Effect of different choices of  $\alpha$  for LCFG:** We use red boxes to mark the artifacts in the images generated without layout conditional CFG and use green boxes to highlight the most aesthetically flawless images across all the others generated with different  $\alpha$ .

| Image       | Prompt                                                                                                                                                                                                                                                                                                                                                                                                                                                                                                                                                                                                                                                                                                                                                                                                                                                                                                                                                                                                                                                                                                                                                                                                                                                                                                                                                                                                                                                                                                                                                                                                                                                                                                                                                                                                                                                                                                                                                                                                                                                                                                                                                                                                                                                                                                                                                                                                                                                                                                                                                                                                                                                                                                                                                                                                                                |
|-------------|---------------------------------------------------------------------------------------------------------------------------------------------------------------------------------------------------------------------------------------------------------------------------------------------------------------------------------------------------------------------------------------------------------------------------------------------------------------------------------------------------------------------------------------------------------------------------------------------------------------------------------------------------------------------------------------------------------------------------------------------------------------------------------------------------------------------------------------------------------------------------------------------------------------------------------------------------------------------------------------------------------------------------------------------------------------------------------------------------------------------------------------------------------------------------------------------------------------------------------------------------------------------------------------------------------------------------------------------------------------------------------------------------------------------------------------------------------------------------------------------------------------------------------------------------------------------------------------------------------------------------------------------------------------------------------------------------------------------------------------------------------------------------------------------------------------------------------------------------------------------------------------------------------------------------------------------------------------------------------------------------------------------------------------------------------------------------------------------------------------------------------------------------------------------------------------------------------------------------------------------------------------------------------------------------------------------------------------------------------------------------------------------------------------------------------------------------------------------------------------------------------------------------------------------------------------------------------------------------------------------------------------------------------------------------------------------------------------------------------------------------------------------------------------------------------------------------------------|
| Fig 1, Col1 | <p>Global: The image is a digital graphic with a blue background and a yellow border. At the top, in large white letters, the text reads 'Business Agency.' Below this title, there are three sections, each with a white background and a yellow dot, containing text and icons. The first section is titled 'Services Offered' and includes a brief description: 'Our comprehensive range of services is designed to address your diverse needs and support your business growth.' The second section is titled 'Team Expertise' and highlights: 'bring a diverse range of expertise to the table. We are passionate about collaborating with you to achieve your goals.' The third section is titled 'Successful Projects' and mentions: 'Our commitment to excellence and innovative problem-solving shines through in every endeavor.' At the bottom of the image, there is a stylized illustration depicting a group of people engaged in a meeting or presentation. The individuals are shown with various expressions and postures, suggesting a dynamic and collaborative environment. The central figure is gesturing towards a chart or graph, likely representing data or progress. The overall style of the image is clean, modern, and professional, with a focus on conveying the agency's capabilities and values. Text: Text "Business" in &lt;color-0&gt;, &lt;en-font-421&gt;. Text "Agency" in &lt;color-5&gt;, &lt;en-font-371&gt;. Text "Services Offered" in &lt;color-5&gt;, &lt;en-font-421&gt;. Text "Our comprehensive range of services is designed to address your diverse needs and support your business growth." in &lt;color-0&gt;, &lt;en-font-403&gt;. Text "Team Expertise" in &lt;color-5&gt;, &lt;en-font-421&gt;. Text "bring a diverse range of expertise to the table. We are passionate about collaborating with you to achieve your goals." in &lt;color-0&gt;, &lt;en-font-403&gt;. Text "Successful Projects" in &lt;color-5&gt;, &lt;en-font-421&gt;. Text "Our commitment to excellence and innovative problem-solving shines through in every endeavor." in &lt;color-0&gt;, &lt;en-font-403&gt;.</p>                                                                                                                                                                                                                                                                                                                                                                                                                                                                                                                                                                                                                                                                                 |
| Fig 1, Col2 | <p>Global: The image is an infographic titled 'Benefits of living with Pet'. It features a cartoon illustration of a person holding a cat. The person is smiling and appears to be enjoying the company of the cat. The cat is white with black stripes and is being held gently. Below the illustration, there are four numbered points, each describing a different benefit of living with a pet. The points are as follows: 1. 'Increase your social interactions. Having a friend can make it easier to start up a conversation.' 2. 'Help with your fitness. Having a pet will, of course, help to increase your energy levels and keep you active.' 3. 'Help with loneliness. Having a pet in our side when we're out and about can make us feel less alone.' 4. 'Reduce stress and anxiety. Spending time with a pet can help boost our mental health.' Each point is accompanied by a small illustration of a cat, reinforcing the theme of the infographic. The cats in the illustrations are depicted in various poses and colors, adding visual interest to the text. The overall style of the image is friendly and informative, aimed at highlighting the positive effects of pet ownership on social, physical, emotional, and mental well-being. Text: Text "Having a friend can make it easier to start up a conversation." in &lt;color-1&gt;, &lt;en-font-0&gt;. Text "Increase your social interactions" in &lt;color-1&gt;, &lt;en-font-316&gt;. Text "Having a pet will, of course, help to increase your energy levels and keep you active." in &lt;color-1&gt;, &lt;en-font-0&gt;. Text "1" in &lt;color-0&gt;, &lt;en-font-316&gt;. Text "Benefits of living with a" in &lt;color-1&gt;, &lt;en-font-316&gt;. Text "Pet" in &lt;color-1&gt;, &lt;en-font-316&gt;. Text "2" in &lt;color-0&gt;, &lt;en-font-316&gt;. Text "3" in &lt;color-0&gt;, &lt;en-font-316&gt;. Text "4" in &lt;color-0&gt;, &lt;en-font-316&gt;. Text "Help with your fitness" in &lt;color-1&gt;, &lt;en-font-316&gt;. Text "Having a pet in our side when we're out and about can make us feel less alone." in &lt;color-1&gt;, &lt;en-font-0&gt;. Text "Help with loneliness" in &lt;color-1&gt;, &lt;en-font-316&gt;. Text "Spending time with a pet can help boost our mental health." in &lt;color-1&gt;, &lt;en-font-0&gt;. Text "Reduce stress and anxiety" in &lt;color-1&gt;, &lt;en-font-316&gt;.</p>                                                                                                                                                                                                                                                                                                                                                                                                                       |
| Fig 1, Col3 | <p>Global: The image is a graphic with a blue background and white text, divided into four sections, each with a different title and accompanying illustration. The title at the top reads 'Tax Planning Strategies' in bold, capital letters. The first section is titled 'Understand Your Tax Bracket' and features an illustration of a target with an arrow pointing at it. The text below the title explains 'By understanding which brackets you fall into, you can make informed decisions about income deferral or acceleration.' The second section is titled 'Maximize Tax-Advantaged Accounts' and shows an illustration of a computer monitor displaying a graph with two lines, one in blue and the other in yellow. The accompanying text explains 'These accounts offer tax deductions, tax-free growth, or tax-free withdrawals for specific purposes.' The third section is titled 'Tax Loss Harvesting' and depicts a hand holding a coin with a dollar sign on it. The text below the title explains 'Offset capital gains by strategically selling investments that have experienced losses.' The fourth and final section is titled 'Plan for Charitable Giving' and features an illustration of two hands shaking, one holding a blue envelope and the other holding a yellow envelope. The text below the title suggests 'Charitable donations can be tax-deductible, so consider making strategic contributions to causes you care about.' Each section is separated by a horizontal line, and the overall style of the image is informational and educational, designed to provide advice on tax planning strategies. Text: Text "Tax Planning Strategies" in &lt;color-0&gt;, &lt;en-font-78&gt;. Text "By understanding which brackets you fall into, you can make informed decisions about income deferral or acceleration." in &lt;color-1&gt;, &lt;en-font-15&gt;. Text "Understand Your Tax Bracket" in &lt;color-0&gt;, &lt;en-font-15&gt;. Text "These accounts offer tax deductions, tax-free growth, or tax-free withdrawals for specific purposes." in &lt;color-1&gt;, &lt;en-font-15&gt;. Text "Maximize Tax-Advantaged Accounts" in &lt;color-0&gt;, &lt;en-font-15&gt;. Text "Offset capital gains by strategically selling investments that have experienced losses." in &lt;color-1&gt;, &lt;en-font-15&gt;. Text "Tax Loss Harvesting" in &lt;color-0&gt;, &lt;en-font-15&gt;. Text "Charitable donations can be tax-deductible, so consider making strategic contributions to causes you care about." in &lt;color-1&gt;, &lt;en-font-15&gt;. Text "Plan for Charitable Giving" in &lt;color-0&gt;, &lt;en-font-15&gt;.</p>                                                                                                                                                               |
| Fig 1, Col4 | <p>Global: The image is a graphic with a warm, earthy color palette, primarily in shades of brown and beige. It features a series of circular icons with illustrations of a dog, each accompanied by text that provides tips on how to train a dog. The tips are numbered from 1 to 5 and are presented in a clear, instructional manner. The first tip, '1. One Goal at A Time,' suggests focusing on one behavior at a time during training, explaining 'Potty training, Play dead or Shake hand whatever it is start out with only one goal in mind.' The second tip, '2. Use A Short Cue Word,' advises 'Use short cue word while training the dog, long sentence only lead to confusion.' The third tip, '3. Use Treats,' emphasizes 'Treats motivate the dog to do the correct action and reward treats for every good behavior.' The fourth tip, '4. Practice, Practice, and Practice,' highlights that 'Repetition is key in perfecting a dog trick keep repeating it until your get hand of it.' The fifth tip, '5. Take it Slow,' suggests 'After practice, give youe dog the much needed rest it deserves, to make him remember the trick.' The text is written in a simple, sans-serif font, and the overall style of the image is clean and modern. The dog in the illustrations is a Corgi, characterized by its short legs and long body, and is depicted in various poses that correspond to the training tips. The background is plain and does not distract from the content. The image includes the URL 'www.yourwebsite.com' at the bottom and is titled 'How to Train Your Dog?' Text: Text "1. One Goal at A Time" in &lt;color-3&gt;, &lt;en-font-458&gt;. Text "Potty training, Play dead or Shake hand whatever it is start out with only one goal in mind." in &lt;color-3&gt;, &lt;en-font-0&gt;. Text "2. Use A Short Cue Word" in &lt;color-3&gt;, &lt;en-font-458&gt;. Text "Use short cue word while training the dog, long sentence only lead to confusion." in &lt;color-3&gt;, &lt;en-font-0&gt;. Text "3. Use Treats" in &lt;color-3&gt;, &lt;en-font-458&gt;. Text "Treats motivate the dog to do the correct action and reward treats for every good behavior." in &lt;color-3&gt;, &lt;en-font-0&gt;. Text "4. Practice, Practice, and Practice" in &lt;color-3&gt;, &lt;en-font-458&gt;. Text "Repetition is key in perfecting a dog trict keep repeating it until your get hand of it." in &lt;color-3&gt;, &lt;en-font-0&gt;. Text "5. Take it Slow" in &lt;color-3&gt;, &lt;en-font-458&gt;. Text "After practice, give youe dog the much needed rest it deserves, to make him remember the trick." in &lt;color-3&gt;, &lt;en-font-0&gt;. Text "www.yourwebsite.com" in &lt;color-86&gt;, &lt;en-font-458&gt;. Text "How to Train Your Dog?" in &lt;color-86&gt;, &lt;en-font-458&gt;.</p> |

*Continued on next page...*

| Image        | Prompt                                                                                                                                                                                                                                                                                                                                                                                                                                                                                                                                                                                                                                                                                                                                                                                                                                                                                                                                                                                                                                                                                                                                                                                                                                                                                                                                                                                                                                                                                                                                                                                                                                                                                                                                                                                                                                                                                                                                                                                                                                                                                                                                                                                                                                                                                                                                                                                                                                                                                                                                                                                                                                                                                                                                                                                                                         |
|--------------|--------------------------------------------------------------------------------------------------------------------------------------------------------------------------------------------------------------------------------------------------------------------------------------------------------------------------------------------------------------------------------------------------------------------------------------------------------------------------------------------------------------------------------------------------------------------------------------------------------------------------------------------------------------------------------------------------------------------------------------------------------------------------------------------------------------------------------------------------------------------------------------------------------------------------------------------------------------------------------------------------------------------------------------------------------------------------------------------------------------------------------------------------------------------------------------------------------------------------------------------------------------------------------------------------------------------------------------------------------------------------------------------------------------------------------------------------------------------------------------------------------------------------------------------------------------------------------------------------------------------------------------------------------------------------------------------------------------------------------------------------------------------------------------------------------------------------------------------------------------------------------------------------------------------------------------------------------------------------------------------------------------------------------------------------------------------------------------------------------------------------------------------------------------------------------------------------------------------------------------------------------------------------------------------------------------------------------------------------------------------------------------------------------------------------------------------------------------------------------------------------------------------------------------------------------------------------------------------------------------------------------------------------------------------------------------------------------------------------------------------------------------------------------------------------------------------------------|
| Fig 1, Col5  | <p>Global: The image is an infographic titled 'MOVING TIPS' with a light blue background and a white border. It features four illustrated tips for moving, each accompanied by a brief description. The tips are as follows: 1. '1.Create a Moving Budget': 'Before moving into a new apartment, create a budget to ensure you have enough money saved for the move. Include deposits, rental fees, moving costs, and any necessary furniture.' 2. '2.Ask About Utilities': 'Ask your landlord about the utilities that are included in your rent. Make sure you understand which ones are included and which ones you'll have to pay for yourself.' 3. '3.Pack Smart': 'Be sure to pack everything in the right boxes and label them appropriately. You'll thank yourself when you're unpacking your stuff in the new apartment.' 4. '4.Make a Plan For today': 'Have a plan before moving day. Make sure you have enough help and the right tools to move all of your stuff safely and efficiently.' In the background, there are two illustrated characters who appear to be in the process of moving. One is carrying a box, while the other is holding a plant. They are standing in front of a moving truck, which is parked next to a stack of boxes. The infographic also includes a website address at the bottom: 'www.reallygoodsite.com'. The overall style of the image is clean and modern, with a clear focus on providing practical advice for those preparing to move. Text: Text "moving" in &lt;color-4&gt;, &lt;en-font-247&gt;. Text "tips" in &lt;color-27&gt;, &lt;en-font-247&gt;. Text "Before moving into a new apartment, create a budget to ensure you have enough money saved for the move. Include deposits, rental fees, moving costs, and any necessary furniture." in &lt;color-1&gt;, &lt;en-font-326&gt;. Text "1.Create a Moving Budget" in &lt;color-4&gt;, &lt;en-font-247&gt;. Text "Ask your landlord about the utilities that are included in your rent. Make sure you understand which ones are included and which ones you'll have to pay for yourself." in &lt;color-1&gt;, &lt;en-font-326&gt;. Text "2.Ask About Utilities" in &lt;color-4&gt;, &lt;en-font-247&gt;. Text "Be sure to pack everything in the right boxes and label them appropriately. You'll thank yourself when you're unpacking your stuff in the new apartment" in &lt;color-1&gt;, &lt;en-font-326&gt;. Text "3.Pack Smart" in &lt;color-4&gt;, &lt;en-font-247&gt;. Text "Have a plan before moving day. Make sure you have enough help and the right tools to move all of your stuff safely and efficiently." in &lt;color-1&gt;, &lt;en-font-326&gt;. Text "4.Make a Plan For today" in &lt;color-4&gt;, &lt;en-font-247&gt;. Text "www.reallygoodsite.com" in &lt;color-4&gt;, &lt;en-font-247&gt;.</p> |
| Fig 10, Col1 | <p>Global: The image is a digital graphic with a dark brown background. At the top, in large white letters, the text reads 'HOW TO TAME PETS'. Below this title, there are four separate sections, each with a heart icon and a piece of advice on how to tame pets. The first section suggests, 'Approach the animal calmly and slowly, using gentle body language to convey that you are not a threat'. The second section advises, 'Offer the animal treats or food to establish a positive association and encourage them to trust you'. The third section recommends, 'Gradually introduce touch and physical contact, starting with gentle strokes or pats, respecting the animal's boundaries'. The fourth section advises, 'Consistently spend time with the animal, engaging in activities they enjoy, and providing a safe and build a bond of trust'. At the bottom of the image, there is a photograph of a small white dog with a black nose and dark eyes. The dog appears to be a French Bulldog. The dog's expression is joyful, with its mouth open and ears perked up, and it is looking directly at the camera. The photograph is framed by a light beige border with a thin brown line. Text: Text "how to tame pets" in &lt;color-81&gt;, &lt;en-font-403&gt;. Text "Offer the animal treats or food to establish a positive association and encourage them to trust you" in &lt;color-2&gt;, &lt;en-font-403&gt;. Text "Approach the animal calmly and slowly, using gentle body language to convey that you are not a threat" in &lt;color-81&gt;, &lt;en-font-403&gt;. Text "Consistently spend time with the animal, engaging in activities they enjoy, and providing a safe and build a bond of trust" in &lt;color-81&gt;, &lt;en-font-403&gt;. Text "Gradually introduce touch and physical contact, starting with gentle strokes or pats, respecting the animal's boundaries" in &lt;color-2&gt;, &lt;en-font-403&gt;.</p>                                                                                                                                                                                                                                                                                                                                                                                                                                                                                                                                                                                                                                                                                                                                                                                                                                                                        |
| Fig 10, Col2 | <p>Global: The image is a graphic representation of a consulting process overview. The title 'CONSULTING PROCESS OVERVIEW' is displayed prominently at the top in bold, black letters within a bordered box. Below the title, there is a subtitle that reads, 'The Consulting Process Overview provides a concise yet comprehensive view of the consulting journey.' The infographic is divided into four distinct stages, each represented by a different section: 1. 'Discovery and Research': This stage is depicted with an icon of a computer monitor and light bulbs, suggesting the process of gathering information and analyzing data. 2. 'Design and Visualization': This stage is illustrated with a design symbol, indicating the idea generation and conceptualization phase. 3. 'Review and Refinement': This stage is represented with a review icon, implying the process of reviewing and refining the design or concept. 4. 'Finalization and Delivery': This stage is shown with a delivery icon, representing the finalization of the project and the delivery of the completed work. Each stage is visually distinguished with a different background color and icon, making it easy to follow the sequence of the consulting process. The overall style of the image is clean and modern, with a clear and straightforward layout that is easy to understand. Text: Text "The Consulting Process Overview provides a concise yet comprehensive view of the consulting journey" in &lt;color-2&gt;, &lt;en-font-216&gt;. Text "Design and Visualization" in &lt;color-1&gt;, &lt;en-font-50&gt;. Text "Review and Refinement" in &lt;color-20&gt;, &lt;en-font-50&gt;. Text "Finalization and Delivery" in &lt;color-1&gt;, &lt;en-font-50&gt;. Text "Consulting Process Overview" in &lt;color-1&gt;, &lt;en-font-216&gt;. Text "Discovery and Research" in &lt;color-20&gt;, &lt;en-font-50&gt;.</p>                                                                                                                                                                                                                                                                                                                                                                                                                                                                                                                                                                                                                                                                                                                                                                                                                                                                                                    |
| Fig 10, Col3 | <p>Global: The image is a vibrant infographic that outlines the benefits of pet hotels. It's designed to be visually appealing with a pink background and a playful, cartoon-like style. The infographic is divided into sections, each highlighting a different benefit. At the top, the title 'Benefits of Pet Hotels' is prominently displayed in bold, purple letters. Just below the title, there's a cute illustration of a cat peeking out from a suitcase, symbolizing the pet-friendly nature of the hotels. The first section, titled 'Professional Care:', features an illustration of a cat being groomed by a professional. This suggests that pet hotels offer grooming services. The second section, 'Safety and Security:', shows an illustration of a cat in a safe, secure environment, possibly indicating that pet hotels provide a safe haven for pets. The third section, 'Exercise and Playtime:', depicts a cat playing with a toy, implying that pet hotels offer opportunities for pets to engage in play and exercise. The fourth section, 'Professional Grooming Services:', features another illustration of a cat being groomed, reinforcing the point made in the first section. The final section, 'Peace of Mind for Pet Owners:', shows a cat sitting contentedly next to a bottle of water, which might symbolize the care and attention given to pets at these hotels, providing pet owners with peace of mind. At the bottom of the infographic, there's a website address 'www.Pethotel.com,' suggesting that this is the website for the pet hotels being advertised. Overall, the infographic is a colorful and engaging way to present the advantages of pet hotels to potential customers. Text: Text "Benefits" in &lt;color-83&gt;, &lt;en-font-179&gt;. Text "of Pet Hotels" in &lt;color-83&gt;, &lt;en-font-179&gt;. Text "www.Pethotel.com" in &lt;color-83&gt;, &lt;en-font-71&gt;. Text "Peace of Mind for Pet Owners:" in &lt;color-0&gt;, &lt;en-font-71&gt;. Text "Safety and Security:" in &lt;color-0&gt;, &lt;en-font-71&gt;. Text "Professional Grooming Services:" in &lt;color-0&gt;, &lt;en-font-71&gt;. Text "Exercise and Playtime:" in &lt;color-0&gt;, &lt;en-font-71&gt;.</p>                                                                                                                                                                                                                                                                                                                                                                                                                                                                                                                                                                                 |
| Fig 10, Col4 | <p>Global: The image is a vibrant orange poster with a white background. It features two illustrations of a fluffy brown and white dog, which appears to be a corgi, sitting on a yellow background. The dog is depicted in a relaxed pose, looking directly at the viewer. At the top of the poster, there is a bold, white text that reads 'Let's Give Our Pet a New Home!'. Below this, there are two pieces of text in a smaller font. The first one states 'Fluffy buddy still needs new adopters to bring them to become human new homie!' and the second one says 'Around 60% of volunteers have already adopted fluffy buddies into their new home!'. At the bottom of the poster, there is a call to action with a white text that reads 'Are you ready to adopt your new homie or give donations? Contact us on:' followed by 'Call:+123 44 55 66 77', 'Visit:www.yoursite.com', and 'E-mail:youremail@gmail.com'. The overall design of the poster is simple and clear, with a focus on the message of adopting pets and the contact information provided. Text: Text "Fluffy buddy still needs new adopters to bring them to become human new homie!" in &lt;color-14&gt;, &lt;en-font-0&gt;. Text "Around 60% of volunteers have already adopted fluffy buddies into their new home!" in &lt;color-14&gt;, &lt;en-font-0&gt;. Text "Are you ready to adopt your new homie or give donations? Contact us on:" in &lt;color-0&gt;, &lt;en-font-0&gt;. Text "Call:+123 44 55 66 77" in &lt;color-0&gt;, &lt;en-font-0&gt;. Text "Visit:www.yoursite.com" in &lt;color-0&gt;, &lt;en-font-0&gt;. Text "E-mail:youremail@gmail.com" in &lt;color-0&gt;, &lt;en-font-0&gt;. Text "Let's Give Our Pet a New Home!" in &lt;color-0&gt;, &lt;en-font-0&gt;.</p>                                                                                                                                                                                                                                                                                                                                                                                                                                                                                                                                                                                                                                                                                                                                                                                                                                                                                                                                                                                                                                                            |

*Continued on next page...*

| Image              | Prompt                                                                                                                                                                                                                                                                                                                                                                                                                                                                                                                                                                                                                                                                                                                                                                                                                                                                                                                                                                                                                                                                                                                                                                                                                                                                                                                                                                                                                                                                                                                                                                                                                                                                                                                                                                                                                                                                                                                                                                                                                                                                                                                                                                                                                                                                                                                                                                                                                                                                                                                                                                                                                                                                                                                                                                                                                                                                                                                                                                                                                                                                                                                                                                                                                                                                                                                                                                                                                                                                                                                                                                                                                                                                                                                                                                                                                                                                                                                                                                                                                                                                                                                                                                                                               |
|--------------------|----------------------------------------------------------------------------------------------------------------------------------------------------------------------------------------------------------------------------------------------------------------------------------------------------------------------------------------------------------------------------------------------------------------------------------------------------------------------------------------------------------------------------------------------------------------------------------------------------------------------------------------------------------------------------------------------------------------------------------------------------------------------------------------------------------------------------------------------------------------------------------------------------------------------------------------------------------------------------------------------------------------------------------------------------------------------------------------------------------------------------------------------------------------------------------------------------------------------------------------------------------------------------------------------------------------------------------------------------------------------------------------------------------------------------------------------------------------------------------------------------------------------------------------------------------------------------------------------------------------------------------------------------------------------------------------------------------------------------------------------------------------------------------------------------------------------------------------------------------------------------------------------------------------------------------------------------------------------------------------------------------------------------------------------------------------------------------------------------------------------------------------------------------------------------------------------------------------------------------------------------------------------------------------------------------------------------------------------------------------------------------------------------------------------------------------------------------------------------------------------------------------------------------------------------------------------------------------------------------------------------------------------------------------------------------------------------------------------------------------------------------------------------------------------------------------------------------------------------------------------------------------------------------------------------------------------------------------------------------------------------------------------------------------------------------------------------------------------------------------------------------------------------------------------------------------------------------------------------------------------------------------------------------------------------------------------------------------------------------------------------------------------------------------------------------------------------------------------------------------------------------------------------------------------------------------------------------------------------------------------------------------------------------------------------------------------------------------------------------------------------------------------------------------------------------------------------------------------------------------------------------------------------------------------------------------------------------------------------------------------------------------------------------------------------------------------------------------------------------------------------------------------------------------------------------------------------------------------|
| Fig 10, Col5       | <p>Global: The image is a digital graphic with a warm, earthy color scheme, primarily in shades of orange and brown. It features a textured background that resembles a sandy beach or a textured surface. At the top, there is a bold title that reads '4 Ways to Create' and 'FINANCIAL PLAN' in capital letters, with the word 'FINANCIAL PLAN' being the most prominent. Below the title, there is a paragraph of text that explains that 'Business financial health can be determined by implementing a financial plan. Prepare your financial plan by following the steps below.' The graphic is divided into four sections, each representing a step in creating a financial plan. Each section is labeled with a number from 1 to 4 and includes a circular icon with a different color and symbol for each step. The icons are simple and abstract, with no specific objects or characters depicted. The first step, labeled '1', is titled 'Compare Your Goals' and includes an icon with a document and a magnifying glass, suggesting a focus on reviewing or analyzing goals. The description reads: 'Thinking about what your company wants to accomplish with a strategic plan helps. Look at numbers first, then consider what you need to achieve your goals.' The second step, '2', is titled 'Plan Your Finances Goals' and features an icon with a document and a pencil, indicating planning or writing. The description reads: 'Consider what it will cost to achieve your goals. Include various scenarios. Create a range to predict the impact of each optimistic and pessimistic scenario.' The third step, '3', is titled 'Contingency Planning' and shows an icon with gears and a document, which might imply strategizing or organizing. The description reads: 'Examine your cash flow statement and assets and formulate a plan for when the business encounters a crisis or when the cash flow is interrupted.' The fourth step, '4', is titled 'Compare Your Goals' again, with an icon that includes a document and a magnifying glass, similar to the first step. The description reads: 'Consider what it will cost to achieve your goals. Include various scenarios. Create a range to predict the impact of each optimistic and pessimistic scenario.' Each step has a brief description underneath the title, providing a brief explanation of the action to be taken. The text is clear and legible, and the overall layout is clean and organized, designed to be informative and easy to follow. Text: Text "4 Ways to Create" in &lt;color-2&gt;, &lt;en-font-400&gt;. Text "Financial Plan" in &lt;color-1&gt;, &lt;en-font-485&gt;. Text "Business financial health can be determined by implementing a financial plan. Prepare your financial plan by following the steps below." in &lt;color-2&gt;, &lt;en-font-342&gt;. Text "Compare Your Goals" in &lt;color-2&gt;, &lt;en-font-342&gt;. Text "1" in &lt;color-2&gt;, &lt;en-font-342&gt;. Text "Thinking about what your company wants to accomplish with a strategic plan helps. Look at numbers first, then consider what you need to achieve your goals." in &lt;color-2&gt;, &lt;en-font-342&gt;. Text "Plan Your Finances Goals" in &lt;color-2&gt;, &lt;en-font-342&gt;. Text "2" in &lt;color-2&gt;, &lt;en-font-342&gt;. Text "Consider what it will cost to achieve your goals. Include various scenarios. Create a range to predict the impact of each optimistic and pessimistic scenario." in &lt;color-2&gt;, &lt;en-font-342&gt;. Text "Contingency Planning" in &lt;color-2&gt;, &lt;en-font-342&gt;. Text "3" in &lt;color-2&gt;, &lt;en-font-342&gt;. Text "Examine your cash flow statement and assets and formulate a plan for when the business encounters a crisis or when the cash flow is interrupted." in &lt;color-2&gt;, &lt;en-font-342&gt;. Text "Compare Your Goals" in &lt;color-2&gt;, &lt;en-font-342&gt;. Text "4" in &lt;color-2&gt;, &lt;en-font-342&gt;. Text "Consider what it will cost to achieve your goals. Include various scenarios. Create a range to predict the impact of each optimistic and pessimistic scenario." in &lt;color-2&gt;, &lt;en-font-342&gt;.</p> |
| Fig 11, Row1, Col1 | <p>Global: The image shows a minimalist concept displayed on a wooden surface. There are three framed pieces of artwork or photographs. The first frame is gold, the second is white with a brown paper insert. To the right of the frames, there is a small potted plant. Below the frames, there are three brown leather-bound books stacked vertically. The overall style of the image is clean and modern, with a focus on simplicity and the use of natural materials. The background is a plain, light-colored wall, which enhances the minimalist aesthetic. There is a circular brown icon on the left side of the image with a white line drawing of a couch and picture frame, accompanied by the text 'Minimalist' and 'CONCEPT'. Text: Text "Minimalist" in &lt;color-0&gt;, &lt;en-font-57&gt;. Text "Concept" in &lt;color-0&gt;, &lt;en-font-0&gt;.</p>                                                                                                                                                                                                                                                                                                                                                                                                                                                                                                                                                                                                                                                                                                                                                                                                                                                                                                                                                                                                                                                                                                                                                                                                                                                                                                                                                                                                                                                                                                                                                                                                                                                                                                                                                                                                                                                                                                                                                                                                                                                                                                                                                                                                                                                                                                                                                                                                                                                                                                                                                                                                                                                                                                                                                                                                                                                                                                                                                                                                                                                                                                                                                                                                                                                                                                                                               |
| Fig 11, Row1, Col2 | <p>Global: The image shows a modern bedroom interior with a focus on lighting. On the left side of the image, there is a bed with a white bedspread and a beige blanket. The bed is positioned against a white brick wall. To the right of the bed, there is a small wooden side table with a black floor lamp on it. On the right side of the image, there is a text overlay that reads 'Lighting'. Below this title, there is a suggestion for improving lighting in a room: 'use more natural lighting by installing glass windows and also use less lighting, such as study lamps'. The text is set against a brown background. At the bottom of the image, there is a credit line that says 'By Company Name'. The overall style of the image is clean and minimalist, with a focus on interior design and lighting solutions. Text: Text "Lighting" in &lt;color-0&gt;, &lt;en-font-57&gt;. Text "use more natural lighting by installing glass windows and also use less lighting, such as study lamps" in &lt;color-0&gt;, &lt;en-font-0&gt;. Text "By Company Name" in &lt;color-0&gt;, &lt;en-font-0&gt;.</p>                                                                                                                                                                                                                                                                                                                                                                                                                                                                                                                                                                                                                                                                                                                                                                                                                                                                                                                                                                                                                                                                                                                                                                                                                                                                                                                                                                                                                                                                                                                                                                                                                                                                                                                                                                                                                                                                                                                                                                                                                                                                                                                                                                                                                                                                                                                                                                                                                                                                                                                                                                                                                                                                                                                                                                                                                                                                                                                                                                                                                                                                                              |
| Fig 11, Row1, Col3 | <p>Global: The image depicts a room with a focus on interior decoration. On the wall, there is a large abstract painting with a mix of colors, predominantly in shades of beige, brown, and white, which gives it a textured appearance. Below the painting, there is a wooden desk with a few items on it, including a small plant in a white pot, a small figure, some paintbrushes in a clear container, and a stack of books. To the right of the desk, there is a small figure of a person, possibly a decorative statue or figurine. On the left side of the image, there is a text box with the word 'Decoration' in a bold, serif font. Below this title, there is a brief description that reads, 'Use abstract painting decorations with minimalist colors and plants and also a small figure.' At the bottom left, there is a text that reads, 'By Company Name'. The overall style of the image is clean and modern, with a focus on simplicity and the use of natural materials. The lighting in the room is soft, creating a warm and inviting atmosphere. The image appears to be a promotional or inspirational graphic, possibly for an interior design company or a lifestyle blog. Text: Text "Decoration" in &lt;color-7&gt;, &lt;en-font-57&gt;. Text "Use abstract painting decorations with minimalist colors and plants and also a small figure" in &lt;color-7&gt;, &lt;en-font-0&gt;. Text "By Company Name" in &lt;color-7&gt;, &lt;en-font-0&gt;.</p>                                                                                                                                                                                                                                                                                                                                                                                                                                                                                                                                                                                                                                                                                                                                                                                                                                                                                                                                                                                                                                                                                                                                                                                                                                                                                                                                                                                                                                                                                                                                                                                                                                                                                                                                                                                                                                                                                                                                                                                                                                                                                                                                                                                                                                                                                                                                                                                                                                                                                                                                                                                                                                                                                                                                    |
| Fig 11, Row2, Col1 | <p>Global: The image is a digital graphic with a combination of text and a photograph. The text at the top reads 'COMPANY NAME', followed by 'Crafting a Winning BUSINESS STRATEGY' in a large, bold font. The photograph shows a man standing in an office environment. He is wearing glasses, a suit, and a tie. Behind him, there is a large window that lets in natural light, and through the window, you can see a cityscape with buildings and trees. The overall style of the image is professional and corporate, likely intended for a business-related context. Text: Text "business strategy" in &lt;color-98&gt;, &lt;en-font-250&gt;. Text "Crafting a Winning" in &lt;color-98&gt;, &lt;en-font-250&gt;. Text "company name" in &lt;color-98&gt;, &lt;en-font-37&gt;.</p>                                                                                                                                                                                                                                                                                                                                                                                                                                                                                                                                                                                                                                                                                                                                                                                                                                                                                                                                                                                                                                                                                                                                                                                                                                                                                                                                                                                                                                                                                                                                                                                                                                                                                                                                                                                                                                                                                                                                                                                                                                                                                                                                                                                                                                                                                                                                                                                                                                                                                                                                                                                                                                                                                                                                                                                                                                                                                                                                                                                                                                                                                                                                                                                                                                                                                                                                                                                                                             |
| Fig 11, Row2, Col2 | <p>Global: The image is a slide from a presentation, specifically an introduction slide. The slide is divided into two main sections. On the left side, there is a photograph of three individuals engaged in a business meeting. They are seated around a table, with papers and a calculator in front of them, suggesting they are discussing financial or strategic matters. The individuals appear to be focused on their work, with one person gesturing towards the papers. The left side of the slide also includes the text 'COMPANY NAME' and 'INTRODUCTION' in a large, bold font, accompanied by a graphic of a yellow sunburst. On the right side of the slide, there is text that serves as an introduction to the topic of the presentation. The text is in a sans-serif font and is written in a clear, readable font size. The text reads: 'Greet the audience and introduce the topic of business strategy. Define business strategy as a roadmap to achieve long-term objectives. Explain that the presentation aims to explore the key components of an effective business strategy.' The text is aligned to the left and is set against a light green background, which contrasts with the darker green background of the left side of the slide. The overall layout of the slide is professional and designed to be informative and engaging for the audience. Text: Text "introduction" in &lt;color-98&gt;, &lt;en-font-250&gt;. Text "company name" in &lt;color-98&gt;, &lt;en-font-37&gt;. Text "Greet the audience and introduce the topic of business strategy." in &lt;color-4&gt;, &lt;en-font-37&gt;. Text "Define business strategy as a roadmap to achieve long-term objectives." in &lt;color-4&gt;, &lt;en-font-37&gt;. Text "Explain that the presentation aims to explore the key components of an effective business strategy." in &lt;color-4&gt;, &lt;en-font-37&gt;.</p>                                                                                                                                                                                                                                                                                                                                                                                                                                                                                                                                                                                                                                                                                                                                                                                                                                                                                                                                                                                                                                                                                                                                                                                                                                                                                                                                                                                                                                                                                                                                                                                                                                                                                                                                                                                                                                                                                                                                                                                                                                                                                                                                                                                                                                                                                                    |

*Continued on next page...*

| Image              | Prompt                                                                                                                                                                                                                                                                                                                                                                                                                                                                                                                                                                                                                                                                                                                                                                                                                                                                                                                                                                                                                                                                                                                                                                                                                                                                                                                                                                                                                                                                                                                                                                                                                                                                                                                                                                                                                                                                                                                                                                                                                                                                                                                                                                                                                                                                                                                                                                                                                                                                                                                                                                                                                                                                                                                                                                                                                                                                                                                                                                                                      |
|--------------------|-------------------------------------------------------------------------------------------------------------------------------------------------------------------------------------------------------------------------------------------------------------------------------------------------------------------------------------------------------------------------------------------------------------------------------------------------------------------------------------------------------------------------------------------------------------------------------------------------------------------------------------------------------------------------------------------------------------------------------------------------------------------------------------------------------------------------------------------------------------------------------------------------------------------------------------------------------------------------------------------------------------------------------------------------------------------------------------------------------------------------------------------------------------------------------------------------------------------------------------------------------------------------------------------------------------------------------------------------------------------------------------------------------------------------------------------------------------------------------------------------------------------------------------------------------------------------------------------------------------------------------------------------------------------------------------------------------------------------------------------------------------------------------------------------------------------------------------------------------------------------------------------------------------------------------------------------------------------------------------------------------------------------------------------------------------------------------------------------------------------------------------------------------------------------------------------------------------------------------------------------------------------------------------------------------------------------------------------------------------------------------------------------------------------------------------------------------------------------------------------------------------------------------------------------------------------------------------------------------------------------------------------------------------------------------------------------------------------------------------------------------------------------------------------------------------------------------------------------------------------------------------------------------------------------------------------------------------------------------------------------------------|
| Fig 11, Row2, Col3 | Global: The image is a composite of two separate sections, each with its own content. On the left side, there is a dark green background with light green text. The text at the top reads 'COMPANY NAME'. Below this, in a larger font size, is the phrase 'SECTION BREAK'. Underneath the section break title, there is a smaller text that says 'Explain the importance of allocating resources effectively to execute the strategy.' On the right side of the image, there is a photograph of a man sitting at a desk. He is wearing glasses and a suit, and he appears to be engaged in work, possibly reading or reviewing documents. The desk has a laptop, a cup that might contain a beverage, and some papers or documents. The background of the photograph shows a window with daylight coming through, suggesting an office environment. Text: Text "section break" in <color-98>, <en-font-250>. Text "company name" in <color-98>, <en-font-37>. Text "Explain the importance of allocating resources effectively to execute the strategy." in <color-98>, <en-font-37>.                                                                                                                                                                                                                                                                                                                                                                                                                                                                                                                                                                                                                                                                                                                                                                                                                                                                                                                                                                                                                                                                                                                                                                                                                                                                                                                                                                                                                                                                                                                                                                                                                                                                                                                                                                                                                                                                                                                      |
| Fig 11, Row3, Col1 | Global: The image features a vibrant green vineyard with rows of grapevines stretching into the distance. The sun is low on the horizon, casting a warm, golden light over the scene, suggesting either sunrise or sunset. In the foreground, there is a graphic design element that resembles a book cover or a sign. This design includes a dark green background with ornate, swirling patterns in a lighter green. At the center, there is a logo with the text 'BOURGON' in a stylized font, and below it, the words 'Family Vineyard' are written in a larger, bold font. The phrase 'in Italy' is placed at the bottom of the design. At the very bottom, the website 'bourgon.it' is mentioned. The overall style of the image is a blend of a real-life photograph of the vineyard with a graphic overlay, possibly for promotional or informational purposes. Text: Text "BOURGON" in <color-0>, <en-font-71>. Text "bourgon.it" in <color-0>, <en-font-71>. Text "FamilyVineyard" in <color-0>, <en-font-53>. Text "in Italy" in <color-35>, <en-font-71>.                                                                                                                                                                                                                                                                                                                                                                                                                                                                                                                                                                                                                                                                                                                                                                                                                                                                                                                                                                                                                                                                                                                                                                                                                                                                                                                                                                                                                                                                                                                                                                                                                                                                                                                                                                                                                                                                                                                                       |
| Fig 11, Row3, Col2 | Global: The image is a digital graphic with a split layout, featuring a photograph on the left and text on the right. The photograph depicts a lush green landscape with rows of grapevines. The vines are well-maintained and appear to be in a healthy state, with green leaves and visible grape clusters. In the background, there is a large, historic building with multiple towers and a prominent clock tower, suggesting a castle or a similar architectural structure. The sky is partly cloudy, and the overall atmosphere of the photograph is serene and picturesque. On the left side of the image, there is a dark green section with decorative golden borders. This section includes the text 'BOURGON', 'About us', and '01 / 04'. On the right side of the image, there is text that provides information about the location and climate of the depicted winery. The text is organized into two sections, with the first section titled 'Location' and the second titled 'Climate'. The text in the 'Location' section reads, 'The winery is located in southern Italy, a region that preserved a special rustic charm and unique atmosphere. Wine hills, filled with delicate fragrances, and beautiful scenery over the Mediterranean Sea leave wine lovers with an unforgettable impression.' The text in the 'Climate' section reads, 'The excellent micro-climate of this region and the lime-rich, well-aerated soils provide ideal conditions for producing premium wines. The winemakers produce a wide range of wine grape varieties to everyone's taste: Pinot Noir, Bonarda, Cabernet Sauvignon, Barbera, Malvasia, Chardonnay, Riesling Italico and Sauvignon Blanc.' The text is in a serif font, which gives it a formal and elegant appearance. The color of the text is a dark shade, contrasting with the lighter background, making it easy to read. The overall style of the image suggests it is likely a promotional or informational graphic for a winery, designed to showcase the beauty of the location and the quality of the wines produced there. Text: Text "The excellent micro-climate of this region and the lime-rich, well-aerated soils provide ideal conditions for producing premium wines. The winemakers produce a wide range of wine grape varieties to everyone's taste: Pinot Noir, Bonarda, Cabernet Sauvignon, Barbera, Malvasia, Chardonnay, Riesling Italico and Sauvignon Blanc." in <color-2>, <en-font-71>. Text "The winery is located in southernItaly, a region that preserved aspecial rustic charm and unique atmosphere. Wine hills, filled with delicate fragrances, and beautiful scenery over the Mediterranean Sea leave wine lovers with an unforgettable impression." in <color-2>, <en-font-71>. Text "Climate" in <color-2>, <en-font-53>. Text "BOURGON" in <color-0>, <en-font-71>. Text "Location" in <color-2>, <en-font-53>. Text "About us" in <color-0>, <en-font-53>. Text "01 / 04" in <color-35>, <en-font-53>. |
| Fig 11, Row3, Col3 | Global: The image is a digital graphic with a split layout. On the left side, there is a photograph of a vineyard with green grapevines and clusters of green grapes. The vines are densely packed, and the leaves are lush and green, indicating a healthy plant. On the right side of the image, there is a dark green background with white and gold text. The text is organized into sections with headers such as 'Distance', 'Address', and 'Contact us'. Under the 'Distance' header, there are listed distances to various locations such as 'Airport Mussony 35 km', 'Railway Station Vulcanum 18 km', 'Bus Stop 8 Main Rd. 1 km', and 'Highway 267 Hickory St. 3 km'. The 'Address' section provides a physical address: '8539 West William Lane (30) 2349 4871, (30) 2349 4710 info@bourgon.it'. At the bottom of the right section, the website 'bourgon.it' is listed. The overall style of the image suggests it is a promotional or informational graphic, possibly for a winery or vineyard, given the context of the vineyard photograph. The design is clean and professional, with a clear focus on providing contact and location information. The logo 'BOURGON' is also displayed prominently. The footer shows '04 / 04'. Text: Text "8539 West William Lane(30) 2349 4871, (30) 2349 4710info@bourgon.it" in <color-0>, <en-font-71>. Text "bourgon.it" in <color-0>, <en-font-71>. Text "AirportRailway Station Bus Stop Highway" in <color-0>, <en-font-71>. Text "Mussony Vulcanum8 Main Rd.267 Hickory St." in <color-35>, <en-font-71>. Text "35 km18 km1 km3 km" in <color-0>, <en-font-71>. Text "Address" in <color-35>, <en-font-53>. Text "BOURGON" in <color-0>, <en-font-71>. Text "Distance" in <color-35>, <en-font-53>. Text "Contact us" in <color-0>, <en-font-53>. Text "04 / 04" in <color-35>, <en-font-53>.                                                                                                                                                                                                                                                                                                                                                                                                                                                                                                                                                                                                                                                                                                                                                                                                                                                                                                                                                                                                                                                                                                                                                    |

Table 9. Detailed prompt for generated infographics and slides in Figure 1, Figure 10 and Figure 11.
